# Supplementary material for: Clinical Utility of Prostate Health Index for Diagnosis of Prostate Cancer in Patients with PI-RADS 3 Lesions
Source: MDPI journal article supplement (doi:10.3390/cancers14174174), 2022-08-29
Supplement: s1 [file s1]

# Supplementary Material: Clinical Utility of Prostate Health Index for Diagnosis of Prostate Cancer in Patients with PI-RADS 3 lesions

Chung Un Lee, Sang Min Lee, Jae Hoon Chung, Minyong Kang, Hyun Hwan Sung, Hwang Gyun Jeon, Byong Chang Jeong, Seong Il Seo, Seong Soo Jeon, Hyun Moo Lee and Wan Song \*

**Table S1.** Baseline characteristics of patients with prostate cancer.

| Variables                          | Overall PCa         | Clinically          |                     | <i>p</i> |
|------------------------------------|---------------------|---------------------|---------------------|----------|
|                                    |                     | Insignificant PCa   | Significant PCa     |          |
| No. of patients, <i>n</i> (%)      | 121 (100.0)         | 62 (51.2)           | 59 (48.8)           |          |
| Age, years                         |                     |                     |                     | 0.625    |
| Median (IQR)                       | 65.0 (60.0–70.0)    | 65.0 (60.0–70.0)    | 64.0 (61.0–68.0)    |          |
| Mean (SD)                          | 64.4 (7.3)          | 64.8 (7.3)          | 63.9 (7.1)          |          |
| Total PSA, ng/ml                   |                     |                     |                     | 0.389    |
| Median (IQR)                       | 6.85 (4.31–10.18)   | 6.74 (4.31–9.52)    | 6.98 (4.40–10.18)   |          |
| Mean (SD)                          | 9.31 (9.21)         | 9.10 (8.39)         | 9.40 (10.1)         |          |
| Prostate volume, ml                |                     |                     |                     | 0.850    |
| Median (IQR)                       | 34.6 (23.9–44.1)    | 34.6 (23.9–44.1)    | 34.5 (24.0–42.9)    |          |
| Mean (SD)                          | 36.7 (18.0)         | 36.5 (15.2)         | 37.2 (18.6)         |          |
| PSAD                               |                     |                     |                     | 0.525    |
| Median (IQR)                       | 0.20 (0.10–0.23)    | 0.19 (0.10–0.21)    | 0.20 (0.11–0.23)    |          |
| Mean (SD)                          | 0.25 (0.19)         | 0.25 (0.18)         | 0.25 (0.20)         |          |
| %fPSA                              |                     |                     |                     | 0.240    |
| Median (IQR)                       | 11.5 (9.9–18.3)     | 11.9 (10.2–18.3)    | 11.2 (9.9–17.8)     |          |
| Mean (SD)                          | 14.1 (6.7)          | 14.5 (6.9)          | 13.3 (7.4)          |          |
| p2PSA, pg/ml                       |                     |                     |                     | 0.287    |
| Median (IQR)                       | 24.24 (18.62–38.74) | 22.60 (18.62–37.30) | 26.41 (21.33–38.74) |          |
| Mean (SD)                          | 27.62 (7.49)        | 25.30 (8.77)        | 29.14 (7.67)        |          |
| %p2PSA                             |                     |                     |                     | 0.182    |
| Median (IQR)                       | 1.81 (1.49–2.23)    | 1.74 (1.49–2.06)    | 1.91 (1.64–2.23)    |          |
| Mean (SD)                          | 2.05 (1.55)         | 2.01 (1.55)         | 2.17 (1.78)         |          |
| PHI                                |                     |                     |                     | 0.224    |
| Median (IQR)                       | 46.5 (35.0–62.1)    | 44.6 (35.0–57.8)    | 48.1 (38.1–62.1)    |          |
| Mean (SD)                          | 51.6 (19.5)         | 49.3 (18.1)         | 52.9 (20.1)         |          |
| Biopsy Gleason grade, <i>n</i> (%) |                     |                     |                     |          |
| 6                                  | 62 (51.2)           | 62 (100.0)          |                     |          |
| 7 (3+4)                            | 47 (38.9)           |                     | 47 (79.7)           |          |
| 8                                  | 12 (9.9)            |                     | 12 (20.3)           |          |

**Table S2.** Cancer detection on target, off target and whole prostate.

| Variables                   | N = 392    |
|-----------------------------|------------|
| Systemic biopsy             |            |
| Benign                      | 337 (86.0) |
| Gleason grade, <i>n</i> (%) |            |
| 6                           | 35 (8.9)   |
| 7 (3+4)                     | 18 (4.6)   |
| 8                           | 2 (0.5)    |
| Target biopsy               |            |
| Benign                      | 271 (69.1) |
| Gleason grade, <i>n</i> (%) |            |

|                             |            |
|-----------------------------|------------|
| 6                           | 62 (15.8)  |
| 7 (3+4)                     | 47 (12.0)  |
| 8                           | 12 (3.1)   |
| Systemic + target biopsy    |            |
| Benign                      | 253 (64.5) |
| Gleason grade, <i>n</i> (%) |            |
| 6                           | 72 (18.4)  |
| 7 (3+4)                     | 55 (14.0)  |
| 8                           | 12 (3.1)   |

---
